# Supplementary material
Source: Springer Nature journal article supplement (https://www.springermedizin.de/resource/supplementary/13049_2011_286_MOESM1_ESM.pdf/9666266)

Scenario A

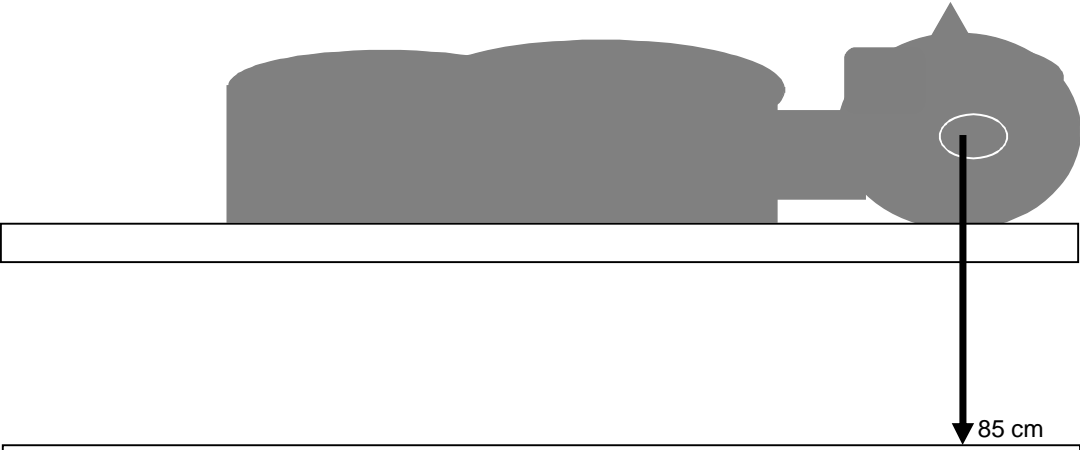

Scenario B

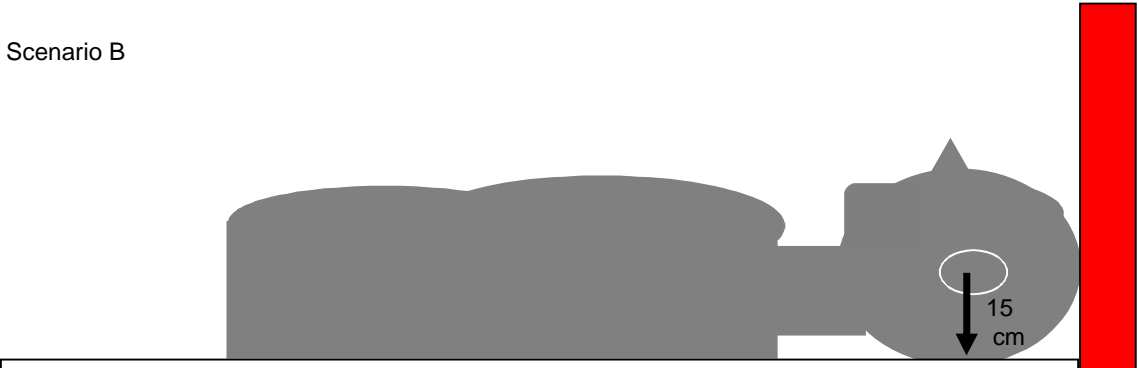

Supplement: MOESM1 [file 9666266]
